# Supplementary material
Source: PubMed Central journal article supplement (PMC5220651)
Supplement: CJN.03390316SupplementaryData.pdf [file CJN.03390316SupplementaryData.pdf]

Supplemental Table 1. Risk of Incident Chronic Kidney Disease by Consumption Frequency of Diet Soda

|            | Categories of Diet Soda Consumption, Glasses/Week (n) |                   |                   |                   | P-value<br>for<br>trend | Continuous Diet Soda<br>Consumption |         |
|------------|-------------------------------------------------------|-------------------|-------------------|-------------------|-------------------------|-------------------------------------|---------|
|            | <1                                                    | 1-4               | 5-7               | >7                |                         | HR (95% CI)                         | P-value |
|            | (n=6,575)                                             | (n=2,643)         | (n=3,810)         | (n=2,026)         |                         |                                     |         |
| CKD, n (%) | 1,171 (17.8%)                                         | 455 (17.2%)       | 740 (19.4%)       | 423 (20.9%)       | <0.001                  | --                                  | --      |
| Model 1    | 1 [Ref]                                               | 0.95 (0.85, 1.06) | 1.23 (1.12, 1.35) | 1.49 (1.33, 1.67) | <0.001                  | 1.18 (1.14, 1.23)                   | <0.001  |
| Model 2    | 1 [Ref]                                               | 0.91 (0.81, 1.01) | 1.05 (0.95, 1.15) | 1.14 (1.02, 1.28) | 0.007                   | 1.08 (1.04, 1.13)                   | <0.001  |
| Model 3a   | 1 [Ref]                                               | 0.91 (0.81, 1.01) | 1.04 (0.95, 1.15) | 1.13 (1.00, 1.27) | 0.01                    | 1.08 (1.03, 1.13)                   | 0.001   |
| Model 3b   | 1 [Ref]                                               | 0.91 (0.81, 1.02) | 1.04 (0.95, 1.15) | 1.13 (1.00, 1.27) | 0.01                    | 1.08 (1.03, 1.13)                   | 0.001   |
| Model 3c   | 1 [Ref]                                               | 0.91 (0.81, 1.01) | 1.05 (0.95, 1.15) | 1.14 (1.01, 1.29) | 0.008                   | 1.09 (1.04, 1.13)                   | <0.001  |

CI, confidence interval; CKD, chronic kidney disease; HR, hazard ratio; sugar-sweetened beverage, SSB

Model 1: Adjusted for age, sex, race-center, education level, smoking status, physical activity, total caloric intake, baseline eGFR (linear spline terms with one knot at 90 mL/min/1.73 m<sup>2</sup>)

Model 2: Model 1 + body mass index category, diabetes, systolic blood pressure, serum uric acid

Model 3a: Model 2 + dietary acid load

Model 3b: Model 2 + diet quality (modified AHEI-2010), dietary sodium, dietary fructose, frequency of consumption of sugar-sweetened beverages

Model 3c: Model 2 + dietary phosphorus
